# Supplementary material for: Psychometric Analysis of the Quarantine Coping Strategies Scale (Q-COPE) in the Spanish Language
Source: MDPI journal article supplement (doi:10.3390/ijerph192214847), 2022-11-11
Supplement: s1 [file s1]

**Table S1.** Escala de Afrontamiento ante una cuarentena (EAC).

|    |                                                                                                                                                                                                    | TED | ED | NAND | DA | TED |
|----|----------------------------------------------------------------------------------------------------------------------------------------------------------------------------------------------------|-----|----|------|----|-----|
| 1  | Considero que tengo la capacidad emocional para afrontar todo el tiempo que dura una cuarentena                                                                                                    |     |    |      |    |     |
| 2  | Considero que el tiempo de cuarentena puede ser aprovechado para desarrollar aspectos de mi vida que en otras circunstancias sería más difícil mejorar                                             |     |    |      |    |     |
| 3  | El tiempo de cuarentena pasado en familia puede fortalecer los vínculos familiares                                                                                                                 |     |    |      |    |     |
| 4  | Veó el tiempo que dura una cuarentena como una excelente oportunidad para desarrollar capacidades y habilidades nuevas                                                                             |     |    |      |    |     |
| 5  | El tiempo que dura una cuarentena me permite mejorar mis vínculos familiares                                                                                                                       |     |    |      |    |     |
| 6  | El tiempo de duración de una cuarentena puede ser muy útil para aprender a encontrar momentos de paz y calma                                                                                       |     |    |      |    |     |
| 7  | Estoy seguro que al finalizar una cuarentena seré una mejor persona de lo que era antes                                                                                                            |     |    |      |    |     |
| 8  | Estoy informado acerca de los hábitos de higiene que debo tener para evitar o reducir la propagación de una enfermedad durante una cuarentena                                                      |     |    |      |    |     |
| 9  | Me he informado del uso correcto de accesorios (mascarillas, guantes, etc.) que generalmente se usan para evitar o reducir la propagación de una enfermedad que obliga a establecer una cuarentena |     |    |      |    |     |
| 10 | Estoy plenamente informado sobre las medidas sanitarias generales que debemos adoptar las personas durante una cuarentena                                                                          |     |    |      |    |     |
| 11 | Me siento tranquilo porque sé cómo informarme para evitar o disminuir el riesgo de propagación de una enfermedad que requiere la realización de una cuarentena                                     |     |    |      |    |     |
| 12 | Sé que puedo acceder a la información provista por las autoridades sanitarias que se encuentran a cargo de mantener las epidemias y pandemias bajo control                                         |     |    |      |    |     |
| 13 | Comprendo bien las razones generales por las cuales se debe acatar una cuarentena                                                                                                                  |     |    |      |    |     |
| 14 | Es posible para mí tener los alimentos necesarios para pasar por una cuarentena                                                                                                                    |     |    |      |    |     |
| 15 | Mis suministros incluyen material de aseo personal suficiente para enfrentar una cuarentena                                                                                                        |     |    |      |    |     |
| 16 | En caso de acabarse mis reservas de alimentos, puedo volver a abastecerme en el mínimo tiempo posible                                                                                              |     |    |      |    |     |
| 17 | Dispongo de un teléfono móvil con cargador funcionando y con suficiente saldo                                                                                                                      |     |    |      |    |     |
| 18 | Estoy convencido(a) de tener las suficientes habilidades para mantener la comunicación a distancia con mis amigos(as) y familiares durante una cuarentena                                          |     |    |      |    |     |
| 19 | Tengo conocimiento de las líneas telefónicas y redes sociales de ayuda establecidas por el gobierno nacional y local durante periodos de cuarentena                                                |     |    |      |    |     |
| 20 | Puedo acceder a líneas telefónicas y redes sociales para comunicarme directamente con personal de salud preparado para atender mis necesidades durante una cuarentena                              |     |    |      |    |     |
| 21 | Una de las sensaciones más agradables de la cuarentena es saber que estando en ella se está contribuyendo al cuidado y protección de otras personas                                                |     |    |      |    |     |
| 22 | Estoy convencido(a) que al acatar la cuarentena protejo del contagio a las personas más vulnerables: niños, ancianos o con condiciones médicas preexistentes                                       |     |    |      |    |     |
| 23 | Estoy convencido(a) que al acatar la cuarentena doy un gran apoyo al trabajo de las autoridades de salud                                                                                           |     |    |      |    |     |

Escala de Afrontamiento ante una cuarentena (EAC). A continuación, encontrarás una lista de afirmaciones que tienen que ver con el afrontamiento auto percibido ante una cuarentena, señale usted su respuesta marcando con una X uno de los casilleros que se ubica en la columna derecha,

utilizando los siguientes criterios: **TED** = Totalmente en desacuerdo, **ED** = En desacuerdo, **NAND** = Ni de acuerdo ni en desacuerdo, **DA**= De acuerdo, **TDA** = Totalmente de acuerdo. Recuerda que: tu sinceridad es muy importante, no hay respuestas buenas ni malas, asegúrate de contestar todas.
